# Supplementary material for: Two novel 3d–4f heterometallic coordination polymers with infinite [Ln4(OH)4]n8n+ chains involving in situ decarboxylation
Source: Royal Society of Chemistry journal article supplement (doi:10.1039/c5dt00586h), 2015-01-01
Supplement: c5dt00586h1.pdf [file c5dt00586h1.pdf]

## Electronic Supplementary Information

### Two novel 3d-4f heterometallic coordination polymers with infinite $[\text{Ln}_4(\text{OH})_4]_n^{8n+}$ chains involving *in situ* decarboxylation

Wen-Ya Wu,<sup>a</sup> Rui-Feng Zhang,<sup>\*a</sup> Xue-Jing Zhang<sup>b</sup> and Peng Cheng<sup>\*b</sup>

<sup>a</sup> School of Chemistry & Material Science, Shanxi Normal University, Linfen, Shanxi 041000, China.

<sup>b</sup> Department of Chemistry, Key Laboratory of Advanced Energy Material Chemistry, MOE, and Collaborative Innovation Center of Chemical Science and Engineering (Tianjin), Nankai University, Tianjin 300071, China.

#### Materials and methods

All commercially available chemicals are of analytical reagent grade and used as supplied without further purification. The C, H and N microanalyses were carried out with a Perkin-Elmer 240Q elemental analyzer. The IR spectra were recorded on a Varian 660-IR spectrometer photometer as KBr pellets in the 4000-400 $\text{cm}^{-1}$ . TGA were recorded with a Netzsch TG 209 apparatus under a nitrogen atmosphere. All of magnetic measurements were performed on a Quantum Design SQUIDMPMS VSM magnetometer. Diamagnetic corrections were made with Pascal's constants for all the sample holders and constituent atoms.

#### X-Ray crystallography

Single crystals appropriate for the X-ray diffraction analysis were elaborately selected under microscope. Single-crystal determinations were performed on SMART APEX CCD diffractometer equipped with graphite monochromated Mo-K $\alpha$  radiation ( $\lambda = 0.71073 \text{ \AA}$ ). Data were collected using  $\omega$  scans mode, and corrected for Lorentz and polarisation effects and absorption using SADABS software. The structures were solved by direct methods with SHELXS-97 software and difference Fourier techniques.<sup>1</sup> The non-hydrogen atoms were also solved by direct methods, and their coordinates and anisotropic thermal parameters were refined by full-matrix least-squares methods on  $F^2$ . The positions of hydrogen atoms were obtained by hydrogenation theoretically. All of the calculations were carried out with program SHELXS-97 and program SHELXL-97. The hydrogen bonding parameters are shown in Table S1-S2. CCDC-1027471 (1) and CCDC-1027472 (2) contain the supplementary crystallographic data for this paper, these data can be obtained free of charge from the Cambridge Crystallographic Data Centre via [www.ccdc.cam.ac.uk/data\\_request/cif](http://www.ccdc.cam.ac.uk/data_request/cif)

Ref S1. M. Sheldrick, *Acta Cryst.*, 2008, **A64**, 112–122.

**Synthesis of [Tb<sub>4</sub>Co(QDA)<sub>2</sub>(QA)<sub>6</sub>(OH)<sub>4</sub>(H<sub>2</sub>O)<sub>4</sub>] (1):** A mixture of Tb<sub>4</sub>O<sub>7</sub> (0.100 g, 0.1 mmol), Co(NO<sub>3</sub>)<sub>2</sub>·6H<sub>2</sub>O (0.116 g, 0.4 mmol), H<sub>2</sub>QDA (0.217 g, 1 mmol) and 8 mL water was sealed in a 23 mL Teflon-lined bomb at 150 °C for 2 days, and then cooled to room temperature at the rate of 20 °C h<sup>-1</sup>. Brown prismatic crystals for **1** were obtained (yield: 28% based on Tb<sub>4</sub>O<sub>7</sub>). Anal. Calc. for **1**, CoTb<sub>4</sub>C<sub>82</sub>H<sub>58</sub>N<sub>8</sub>O<sub>28</sub>: C 42.82, H 2.52, N 4.87%. Found: C 42.52, H 2.91, N 4.74%. IR bands (cm<sup>-1</sup>) for **1**: 3432(vs), 1617(vs), 1601(vs), 1579(vs), 1545(s), 1493(w), 1461(s), 1428(s), 1416(s), 1400(s), 1317(m), 1210(w), 1128(w), 1066(w), 964(w), 937(w), 799(s), 770(w), 748(m), 614(w), 590(m).

**Synthesis of [Dy<sub>4</sub>Co(QDA)<sub>2</sub>(QA)<sub>6</sub>(OH)<sub>4</sub>(H<sub>2</sub>O)<sub>4</sub>] (2):** A mixture of Dy<sub>2</sub>O<sub>3</sub> (0.075 g, 0.2 mmol), Co(NO<sub>3</sub>)<sub>2</sub>·6H<sub>2</sub>O (0.116 g, 0.4 mmol), H<sub>2</sub>QDA (0.217 g, 1 mmol) and 8 mL water was sealed in a 23 mL Teflon-lined bomb at 150 °C for 2 days, and then cooled to room temperature at the rate of 20 °C h<sup>-1</sup>. Brown prismatic crystals for **2** were obtained (yield: 23% based on Dy<sub>2</sub>O<sub>3</sub>). Anal. Calc. for **2**, CoDy<sub>4</sub>C<sub>82</sub>H<sub>58</sub>N<sub>8</sub>O<sub>28</sub>: C 42.56, H 2.51, N 4.84%. Found: C 42.56, H 2.88, N 5.06%. IR bands (cm<sup>-1</sup>) for **2**: 3444(vs), 1647(vs), 1620(vs), 1587(vs), 1543(s), 1508(w), 1496(w), 1465(s), 1433(s), 1409(s), 1323(m), 1209(w), 1109(w), 1055(w), 960(w), 927(w), 800(s), 773(w), 748(m), 615(w), 596(m).

**Crystallographic data for compound 1:** *M<sub>r</sub>* = 2297.97, triclinic, *P* $\bar{1}$ , *a* = 7.6995(15) Å, *b* = 13.461(3) Å, *c* = 19.040(4) Å,  $\alpha$  = 109.24(3)°,  $\beta$  = 93.49(3)°,  $\gamma$  = 92.70(3)°, *V* = 1879.6(6) Å<sup>3</sup>, *Z* = 1, *D<sub>c</sub>* = 2.030 g cm<sup>-3</sup>,  $\mu$  = 4.025 mm<sup>-1</sup>, *F*(000) = 1117, GOF = 1.085, a total of 18022 reflections were collected, 8308 of which were unique (*R<sub>int</sub>* = 0.0344). *R*<sub>1</sub> (*wR*<sub>2</sub>) = 0.0330 (0.0866) for 556 parameters and 7096 reflections (*I* > 2σ(*I*)).

**Crystallographic data for compound 2:** *M<sub>r</sub>* = 2312.29, triclinic, *P* $\bar{1}$ , *a* = 7.6805(15) Å, *b* = 13.635(3) Å, *c* = 19.036(4) Å,  $\alpha$  = 109.16(3)°,  $\beta$  = 93.43(3)°,  $\gamma$  = 92.75(3)°, *V* = 1875.0(6) Å<sup>3</sup>, *Z* = 1, *D<sub>c</sub>* = 2.048 g cm<sup>-3</sup>,  $\mu$  = 4.248 mm<sup>-1</sup>, *F*(000) = 1121, GOF = 1.097, a total of 18364 reflections were collected, 8474 of which were unique (*R<sub>int</sub>* = 0.0313). *R*<sub>1</sub> (*wR*<sub>2</sub>) = 0.0299 (0.0715) for 556 parameters and 7444 reflections (*I* > 2σ(*I*)).

**Table S1** SHAPE analysis of Dy<sup>III</sup> cation in **2**.

| Label    | SHAPE                                      | Symmetry               | Distortion(Dy1/Dy2) |
|----------|--------------------------------------------|------------------------|---------------------|
| OP-8     | Octagon                                    | <i>D</i> <sub>8h</sub> | 32.502/28.377       |
| HPY-8    | Heptagonal pyramid                         | <i>C</i> <sub>7v</sub> | 23.691/25.238       |
| HBPY-8   | Hexagonal bipyramid                        | <i>D</i> <sub>6h</sub> | 14.004/11.824       |
| CU-8     | Cube                                       | <i>O</i> <sub>h</sub>  | 9.587/7.718         |
| SAPR-8   | Square antiprism                           | <i>D</i> <sub>4d</sub> | 2.773/2.745         |
| TDD-8    | Triangular dodecahedron                    | <i>D</i> <sub>2d</sub> | 1.316/3.003         |
| JGBF-8   | Johnson gyrobifastigium J26                | <i>D</i> <sub>2d</sub> | 12.526/9.887        |
| JETBPY-8 | Johnson elongated triangular bipyramid J14 | <i>D</i> <sub>3h</sub> | 26.762/26.250       |
| JBTPR-8  | Biaugmented trigonal prism J50             | <i>C</i> <sub>2v</sub> | 1.787/2.242         |
| BTPR-8   | Biaugmented trigonal prism                 | <i>C</i> <sub>2v</sub> | 1.682/1.881         |
| JSD-8    | Snub diphenoid J84                         | <i>D</i> <sub>2d</sub> | 3.798/4.007         |
| TT-8     | Triakis tetrahedron                        | <i>T</i> <sub>d</sub>  | 10.313/8.345        |
| ETBPY-8  | Elongated trigonal bipyramid               | <i>D</i> <sub>3h</sub> | 23.527/22.223       |

**Table S2** Hydrogen bonds for compound **1**.

| D-H...A/(°)            | d(D-H)/(Å) | d(H...A)/(Å) | d(D...A)/(Å) | <(D-H-A) |
|------------------------|------------|--------------|--------------|----------|
| O(11)-H(111)...O(6)#3  | 0.85       | 2.12         | 2.949(6)     | 164.3    |
| O(12)-H(121)...O(10)#3 | 0.85       | 2.25         | 3.030(6)     | 152.5    |
| O(13)-H(131)...O(9)#6  | 0.85       | 2.48         | 2.865(5)     | 108.7    |
| O(13)-H(131)...O(8)#6  | 0.85       | 2.71         | 2.941(5)     | 97.3     |
| O(14)-H(141)...N(3)    | 0.85       | 1.92         | 2.743(7)     | 161.7    |
| O(14)-H(142)...O(6)#7  | 0.85       | 1.90         | 2.754(7)     | 177.3    |

Symmetry transformations used to generate equivalent atoms:

#3 -x+1, -y, -z; #6 -x, -y, -z; #7 -x+1, -y+1, -z

**Table S3** Hydrogen bonds for compound **2**.

| D-H...A/(°)            | d(D-H)/(Å) | d(H...A)/(Å) | d(D...A)/(Å) | <(D-H-A) |
|------------------------|------------|--------------|--------------|----------|
| O(11)-H(111)...O(6)#3  | 0.85       | 2.13         | 2.953(5)     | 163.9    |
| O(12)-H(121)...O(10)#3 | 0.85       | 2.25         | 3.029(5)     | 152.4    |
| O(13)-H(131)...O(9)#6  | 0.85       | 2.47         | 2.856(4)     | 108.6    |
| O(13)-H(131)...O(8)#6  | 0.85       | 2.70         | 2.934(4)     | 97.3     |
| O(14)-H(141)...N(3)    | 0.85       | 1.92         | 2.742(6)     | 161.7    |
| O(14)-H(142)...O(6)#7  | 0.85       | 1.91         | 2.756(5)     | 177.0    |

Symmetry transformations used to generate equivalent atoms:

#3 -x+1, -y, -z; #6 -x, -y, -z; #7 -x+1, -y+1, -z

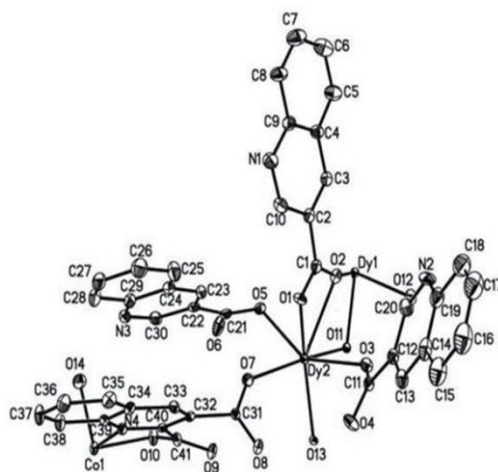

**Fig. S1** The asymmetric unit of **2**.

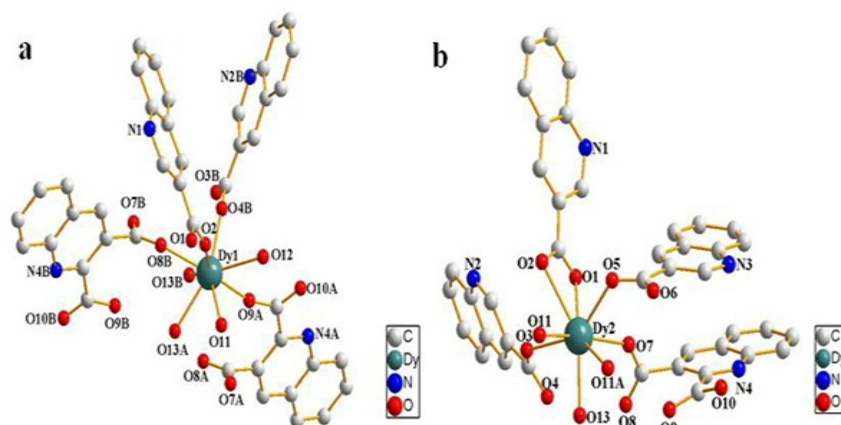

**Fig. S2** Coordination environment of Dy1 (a) and Dy2 (b). Atoms with A, B in their labels are symmetry generated. Symmetry code: A:  $1-x, -y, -z$ ; B:  $1+x, y, z$ .

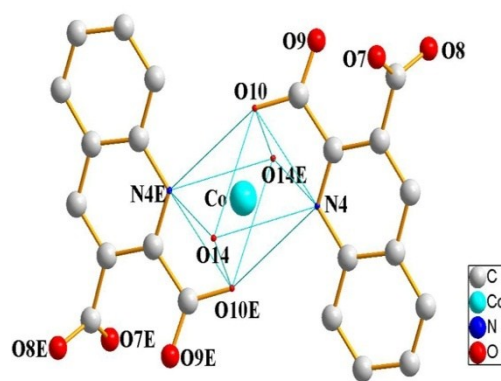

**Fig. S3** Coordination environment of Co. Atoms with E in their labels are symmetry generated. Symmetry code: E:  $-x, 1-y, -z$ .

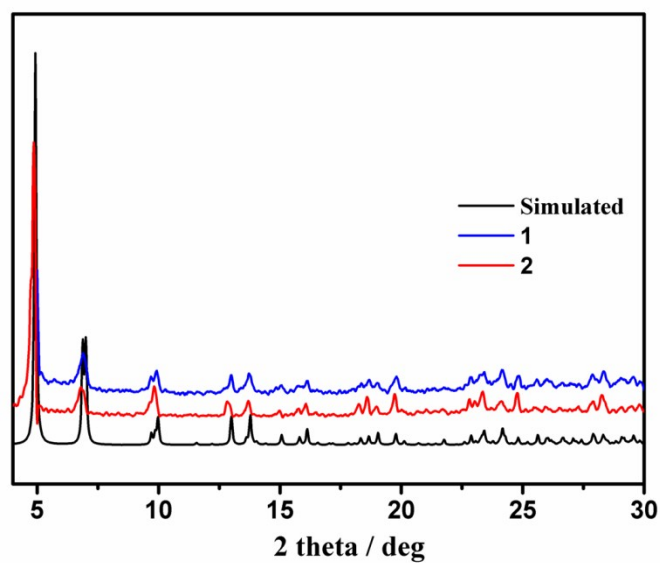

Fig. S4 PXRD patterns of **1** and **2**.

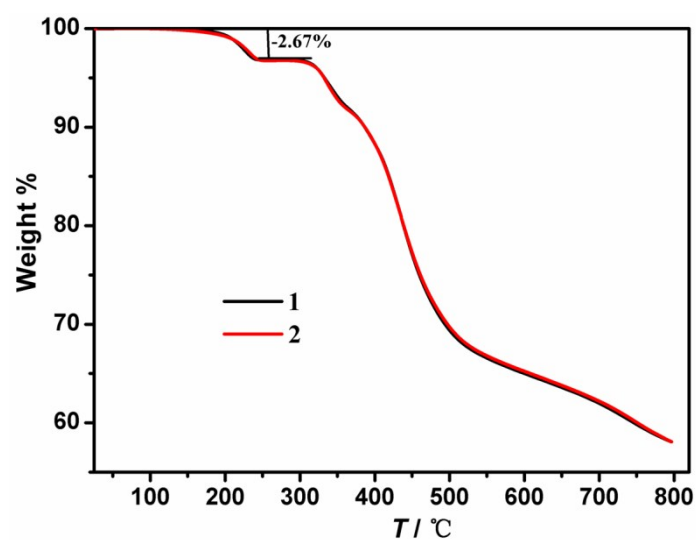

Fig. S5 The TG curves of **1** and **2**.

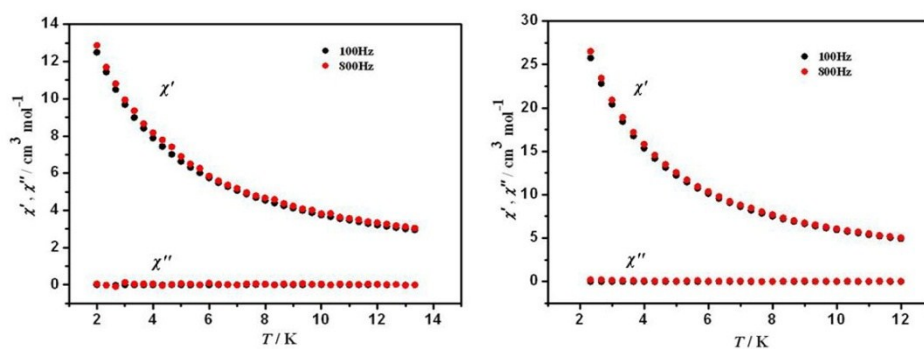

Fig. S6 Temperature dependence of ac susceptibilities under zero field for **1** (left) and **2** (right).
